# Supplementary material for: Sequestration within peptide coacervates improves the fluorescence intensity, kinetics, and limits of detection of dye-based DNA biosensors
Source: PubMed Central journal article supplement (PMC10904739; doi:10.1038/s42004-024-01124-3), 2024-02-29
Supplement: 42004_2024_1124_MOESM3_ESM.pdf [file 42004_2024_1124_MOESM3_ESM.pdf]

# Description of Additional Supplementary Files

**File name:** Supplementary Data 1

**Description:** Data presented in figures in excel format. Each tab correlates to a figure, panels are separated within each tab.
